# Supplementary material
Source: publisher site journal article supplement (https://www.dovepress.com/article/602792)
Supplement: Supplementary file 1 [file 602792%20Supplementary%20Tables.docx]

**Supplementary Table S1.** Cytokine × Intraoperative Oxidative Stress Interaction Models Predicting 6-Month Pain Outcomes

| **Cytokine Moderator** | **6-Month Pain Outcome** | **N** | **Interaction β [95% CI]** | **p (unadjusted)** | **p (FDR-adjusted)** | **Model R²** |
| --- | --- | --- | --- | --- | --- | --- |
| IL-10 | KOOS-JR | 58 | 0.630 [-7.751, 9.011] | 0.881 | 0.925 | 0.157 |
| IL-10 | MPQ-2 Continuous | 58 | 0.326 [-0.287, 0.938] | 0.290 | 0.436 | 0.180 |
| IL-10 | MPQ-2 Neuropathic | 57 | 0.440 [0.058, 0.823] | 0.025 | 0.252 | 0.363 |
| IL-10 | MPQ-2 Total | 57 | 0.333 [-0.129, 0.795] | 0.154 | 0.323 | 0.229 |
| IL-10 | NRS Average Pain | 58 | 0.514 [-0.151, 1.178] | 0.127 | 0.323 | 0.225 |
| IL-10 | NRS Worst Pain | 58 | 0.006 [-1.409, 1.421] | 0.993 | 0.993 | 0.168 |
| IL-10 | PROMIS Interference | 58 | 0.791 [-3.700, 5.283] | 0.725 | 0.897 | 0.239 |
| IL-6 | KOOS-JR | 58 | -1.430 [-7.869, 5.009] | 0.657 | 0.897 | 0.161 |
| IL-6 | MPQ-2 Continuous | 58 | 0.407 [-0.056, 0.869] | 0.083 | 0.323 | 0.212 |
| IL-6 | MPQ-2 Neuropathic | 57 | 0.211 [-0.094, 0.515] | 0.170 | 0.325 | 0.323 |
| IL-6 | MPQ-2 Total | 57 | 0.302 [-0.052, 0.655] | 0.093 | 0.323 | 0.243 |
| IL-6 | NRS Average Pain | 58 | 0.529 [0.036, 1.022] | 0.036 | 0.252 | 0.281 |
| IL-6 | NRS Worst Pain | 58 | 0.596 [-0.487, 1.678] | 0.274 | 0.436 | 0.180 |
| IL-6 | PROMIS Interference | 58 | 3.226 [-0.127, 6.579] | 0.059 | 0.310 | 0.285 |
| TNF-α | KOOS-JR | 58 | 0.761 [-8.028, 9.550] | 0.863 | 0.925 | 0.203 |
| TNF-α | MPQ-2 Continuous | 58 | 0.425 [-0.144, 0.995] | 0.140 | 0.323 | 0.391 |
| TNF-α | MPQ-2 Neuropathic | 57 | 0.461 [0.100, 0.823] | 0.013 | 0.252 | 0.514 |
| TNF-α | MPQ-2 Total | 57 | 0.341 [-0.095, 0.778] | 0.123 | 0.323 | 0.411 |
| TNF-α | NRS Average Pain | 58 | 0.396 [-0.246, 1.039] | 0.221 | 0.386 | 0.378 |
| TNF-α | NRS Worst Pain | 58 | -0.264 [-1.768, 1.240] | 0.726 | 0.897 | 0.193 |
| TNF-α | PROMIS Interference | 58 | 0.433 [-4.322, 5.188] | 0.855 | 0.925 | 0.266 |
| *Note. Each row represents a separate hierarchical linear regression model testing the interaction between intraoperative oxidative stress and the specified baseline cytokine moderator on the 6-month pain outcome. All models adjusted for sex, age, BMI, ischemia duration, and baseline pain. β = unstandardized interaction coefficient; CI = confidence interval; FDR = false discovery rate (Benjamini-Hochberg method across all 21 tests); R² = total model R-squared. N = 57 for models predicting MPQ-2 Neuropathic due to one participant with missing outcome data.* | | | | | | |

**Supplementary Table S2.** Comparison of Analyzed and Non-Analyzed Participants

|  | **Analyzed (n = 58)** | **Not Analyzed (n = 54)** | **p-value** |
| --- | --- | --- | --- |
| Age, years | 67.4 (7.3) | 67.6 (6.5) | 0.935 |
| Female sex, n (%) | 37 (64%) | 35 (65%) | 1.000 |
| BMI, kg/m² | 31.8 (5.7) | 31.8 (4.8) | 0.963 |
| Ischemia duration, min | 73.2 (15.1) | 69.9 (12.1) | 0.200 |
| Baseline MPQ-2 Total | 2.3 (1.8) | 2.3 (1.8) | 0.862 |
| Baseline NRS Worst Pain | 6.0 (2.5) | 5.8 (2.6) | 0.703 |
| Baseline NRS Average Pain | 3.9 (2.0) | 3.9 (2.1) | 0.914 |
| 6-mo MPQ-2 Total | 0.4 (0.7) | 0.6 (0.9) | 0.289 |
| 6-mo NRS Worst Pain | 1.5 (2.1) | 1.7 (2.2) | 0.650 |
| 6-mo NRS Average Pain | 0.6 (1.0) | 1.0 (1.5) | 0.144 |
| 6-mo PROMIS Interference | 45.9 (6.9) | 47.5 (7.8) | 0.239 |
| 6-mo KOOS-JR | 78.5 (12.2) | 76.4 (14.7) | 0.410 |
| *Note. Values are mean (SD) for continuous variables and n (%) for categorical variables. The analyzed sample includes all participants with complete baseline cytokine, intraoperative oxidative stress, and baseline pain data. Participants not analyzed lacked cytokine data because assays were added after study initiation. P-values from independent-samples t-tests (continuous) or Fisher's exact test (categorical).* | | | |
